# Supplementary material for: Signatures of a macroscopic switching transition for a dynamic microtubule
Source: PubMed Central journal article supplement (PMC5379563; doi:10.1038/srep45747), 2017-04-04
Supplement: srep45747-s1.pdf [file srep45747-s1.pdf]

# Signatures of a macroscopic switching transition for a dynamic microtubule

Aparna J S, Ranjith Padinhateeri, Dibyendu Das, Indian Institute of Technology Bombay, India

## Supplementary Information

### S1. Phase diagrams

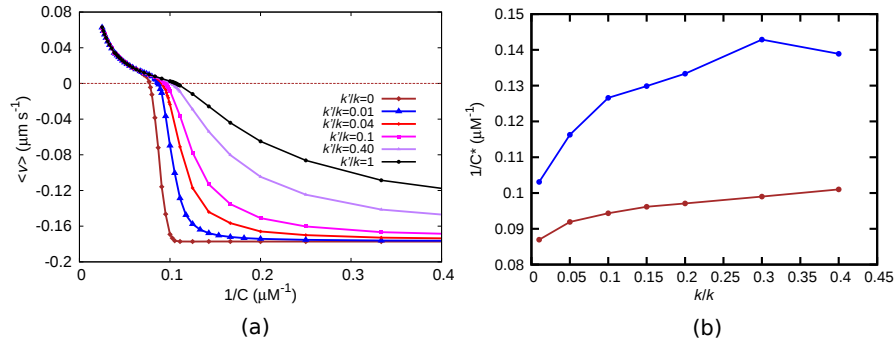

Figure S1

Although we have not done extensive study to draw a complete parallel between the discontinuous transition in microtubules as discussed in the manuscript, and the equilibrium liquid-gas phase transition, we indicate a few simple analogies here. Temperature, pressure and specific volume in a liquid-gas transition may be compared to the polymerisation ratio  $k'/k$ , inverse concentration  $1/C$  and mean velocity  $\langle v \rangle$ , respectively, in the microtubule system. The  $1/C$  versus  $\langle v \rangle$  curves (equivalent of the pressure-volume phase diagram) for various  $k'/k$  are plotted in Fig. S1(a). They are reminiscent of liquid-gas isotherms. The co-existence line of inverse concentration versus  $k'/k$  (equivalent of pressure-temperature co-existence line) is plotted in Fig. S1(b) - the lower brown curve is for critical concentrations  $C^*$  at which average velocity  $\langle v \rangle$  vanishes, while the upper blue curve corresponds to the transition concentrations  $C_2^*$  at which  $d\langle v \rangle/dC$  has maximum. Like liquid-gas system, where the first order transition pressure increases monotonically with transition temperature, here too we find similar monotonic increase of  $1/C^*$  and  $1/C_2^*$  as a function of  $k'/k$ .

### S2. Cumulants of velocity distribution for the limit $k'/k = 0$

As mentioned in the manuscript, we plot the scaled variance ( $T\sigma^2$ ) (Figure. S2(a)) and Binder cumulant (BC) (Figure. S2(b)) of velocity distribution as a function of GTP-tubulin concentration  $C$ , for  $k'/k = 0$ . We note that the behaviour of these higher cumulants as 'system size'  $T$  becomes larger is qualitatively similar to that shown for  $k'/k = 0.01$  in Figure. 4 in the manuscript.

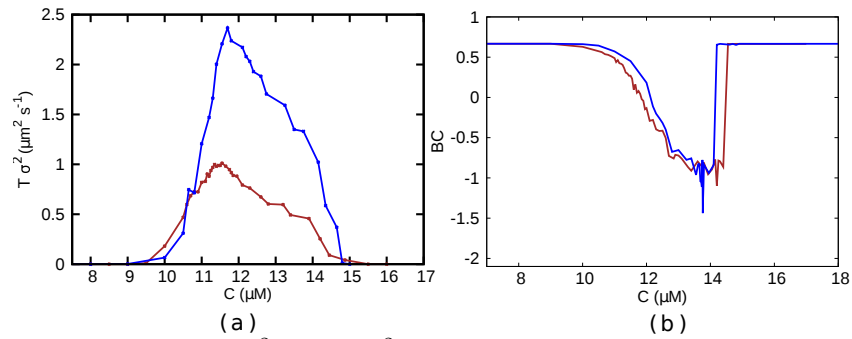

**Figure S2.** (a) Scaled variance  $T\sigma^2$  (where  $\sigma^2$  is the variance of the velocity distribution) is plotted against concentration  $C$ , for values of  $T = 200\text{s}$  (brown) and  $T = 500\text{s}$  (blue). It can be observed that as ‘system size’  $T$  becomes large,  $T\sigma^2$  tends to diverge. (b) Binder cumulant, BC (as defined in the manuscript) is plotted as a function of concentration  $C$  for values of  $T = 200\text{s}$  (brown) and  $T = 500\text{s}$  (blue). The sharp negative dip in BC for large  $T$  near the transition concentration is indicative of a discontinuous transition as discussed in the manuscript.
